# Supplementary material for: Intranasal vaccination with an inactivated whole influenza virus vaccine induces strong antibody responses in serum and nasal mucus of healthy adults
Source: PubMed Central journal article supplement — Hum Vaccin Immunother. 2013 Jun 27;9(9):1962–70. doi: 10.4161/hv.25458 (PMC3906363; doi:10.4161/hv.25458), 2013-06-27
Supplement: hvi-9-1962-s01.pdf [file hvi-9-1962-s01.pdf]

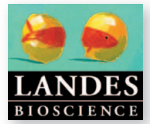

## **Supplemental Material to:**

**Akira Ainai, Shin-ichi Tamura, Tadaki Suzuki, Elly van Riet,  
Ryo Ito, Takato Odagiri, Masato Tashiro, Takeshi Kurata and  
Hideki Hasegawa**

**Intranasal vaccination with an inactivated whole influenza  
virus vaccine induces strong antibody responses in serum  
and nasal mucus of healthy adults**

**2013; 9(9)**

**<http://dx.doi.org/10.4161/hv.25458>**

**[www.landesbioscience.com/journals/vaccines/article/25458](http://www.landesbioscience.com/journals/vaccines/article/25458)**

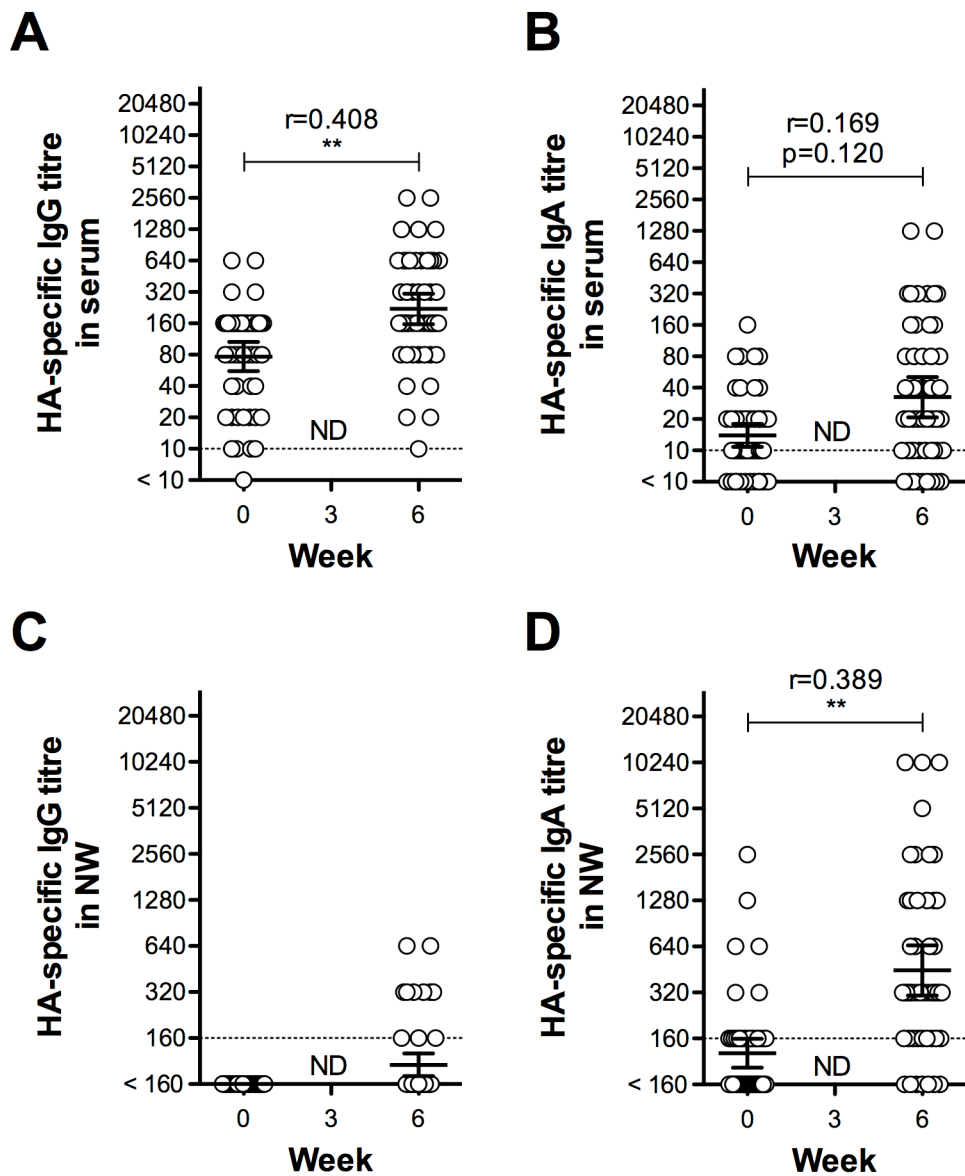

**Supplemental Figure 1. HA-specific IgG and IgA antibody titre in serum and nasal wash.**

HA-specific IgG (A, C) and IgA (B, D) responses in serum (A, B) and nasal wash (C, D) were estimated by ELISA. Two-fold serial dilutions of serum and nasal wash started from 1:10 and 1:160, respectively, were used for the assay. Each circle represents an individual. A paired t tests was performed to compare data from week 0 (pre) and 6 (post). The correlation coefficient ( $r$ ) and  $p$  value were calculated. \*\*:  $p < 0.01$ .

**A**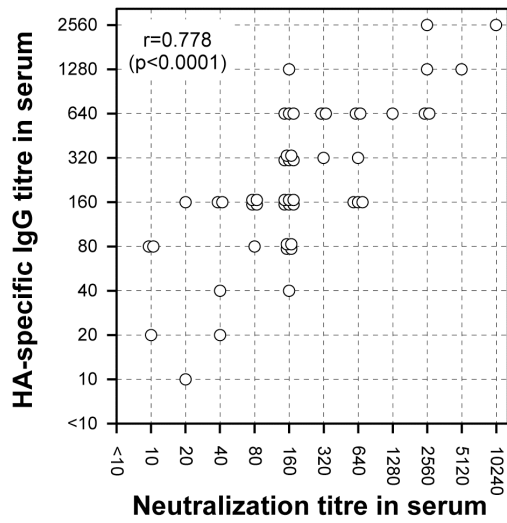**B**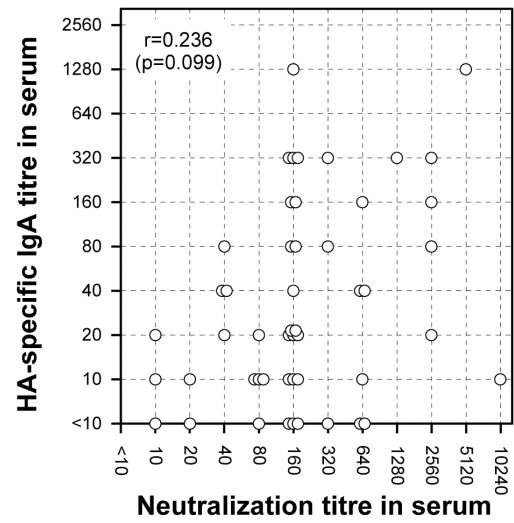**C**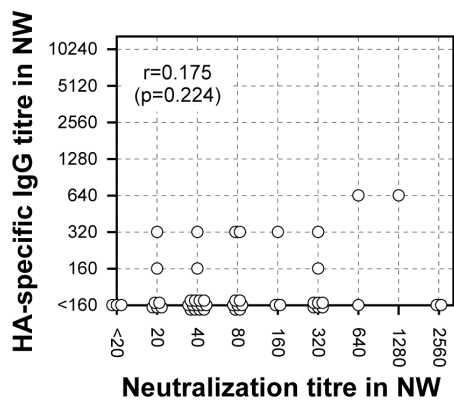**D**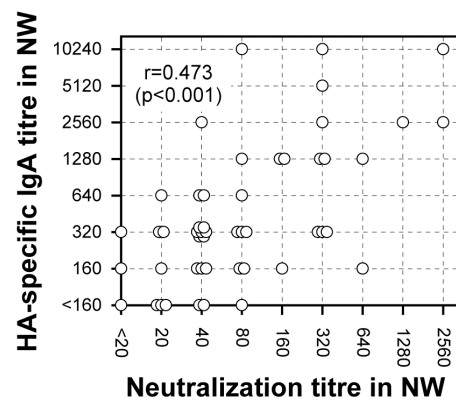

**Supplemental Figure 2. Correlation between NT and HA-specific IgG or IgA titres.**

For serum (A, B) and nasal samples (C, D) 3 weeks after the secondary vaccination, relationships between NT titres and HA-specific IgG (A, C) or IgA (B, D) titres were visualized. Each circle represents an individual. Pearson  $r$  value and  $p$  value were calculated.
